# Supplementary material for: Mir30c Is Involved in Diabetic Cardiomyopathy through Regulation of Cardiac Autophagy via BECN1
Source: PubMed Central journal article supplement — Mol Ther Nucleic Acids. 2017 Mar 29;7:127–39. doi: 10.1016/j.omtn.2017.03.005 (PMC5415963; doi:10.1016/j.omtn.2017.03.005), 2017-03-29
Supplement: mmc1.pdf [file mmc1.pdf]

OMTN, Volume 7

## Supplemental Information

### ***Mir30c* Is Involved in Diabetic Cardiomyopathy through Regulation of Cardiac Autophagy via BECN1**

Chen Chen, Shenglan Yang, Huaping Li, Zhongwei Yin, Jiahui Fan, Yanru Zhao, Wei Gong, Mengwen Yan, and Dao Wen Wang

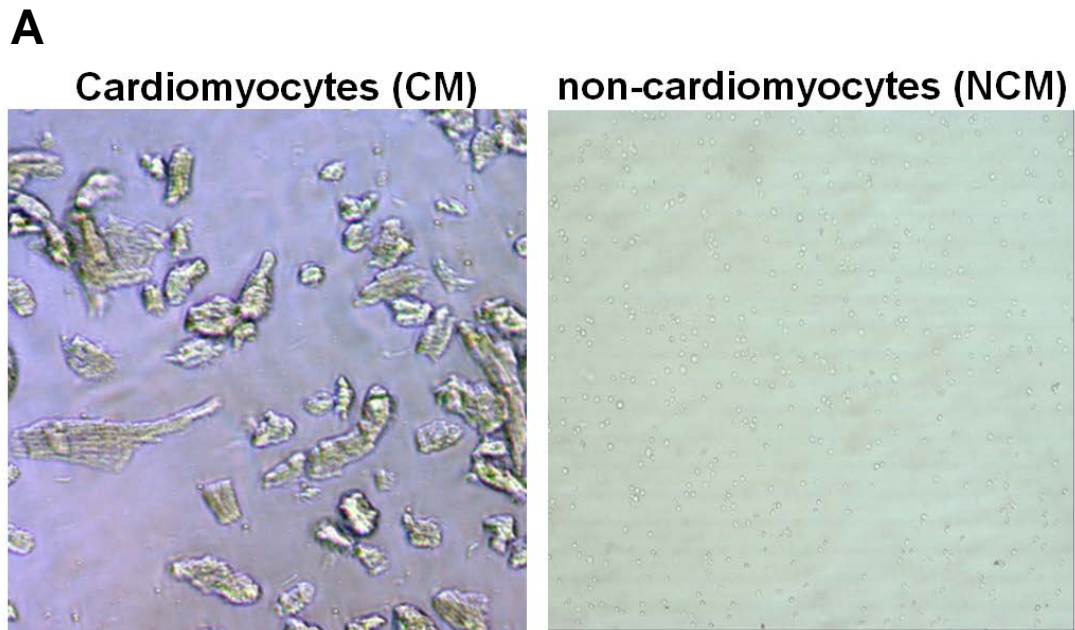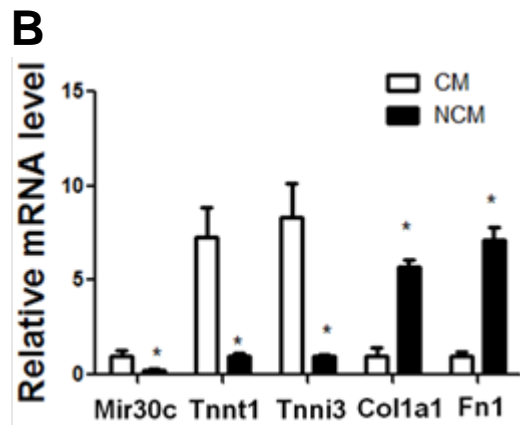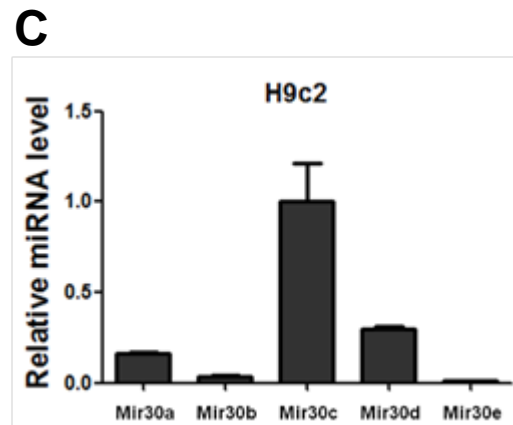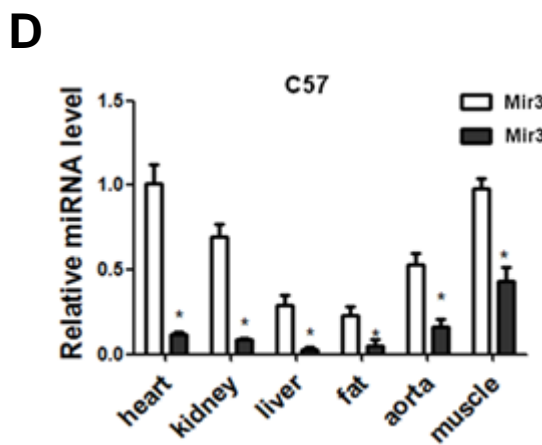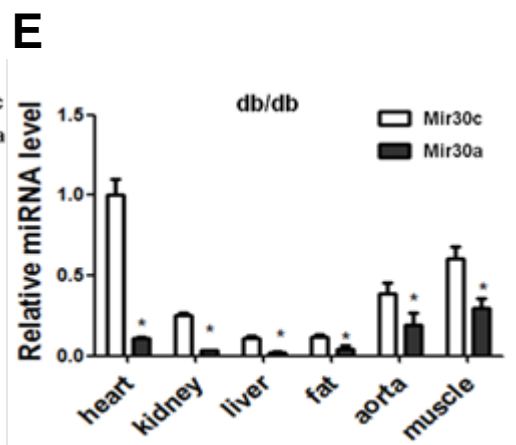

**Supplemental Figure 1. Mir30c distribution and expression in various organs.** A, Morphology of isolated primary cells. The small circles in the NCM image represent fibroblasts. B to E, Relative gene expression, as determined

by qRT-PCR. B, Relative expression of CM and NCM markers in isolated primary cells. \* $p < 0.05$  vs. CMs. C, Relative expression of Mir30 family miRNAs in H9c2 cells. D, Relative expression of Mir30a and Mir30c in various organs of C57BL/Ks mice. \* $p < 0.05$  vs. Mir30c. E, Relative expression of Mir30a and Mir30c in various organs of db/db mice. \* $p < 0.05$  vs. Mir30c. Data are expressed as mean $\pm$ SEM, n=8. Data are representative of three independent experiments.

**A**

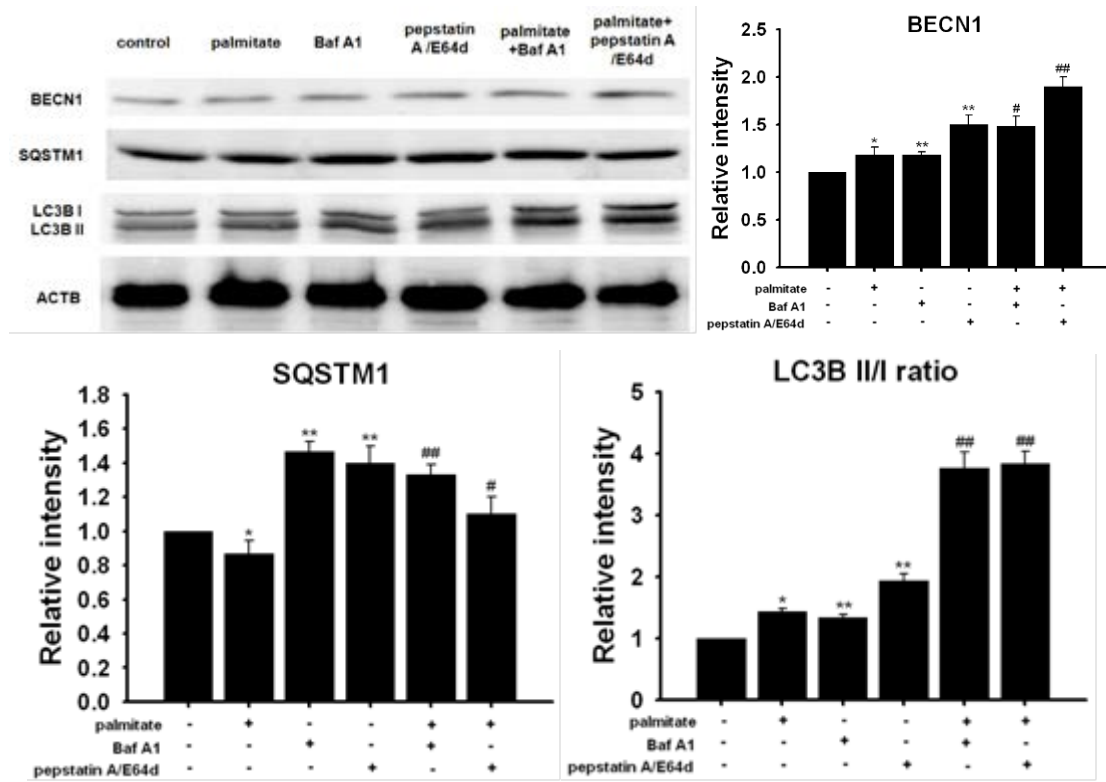

**B**

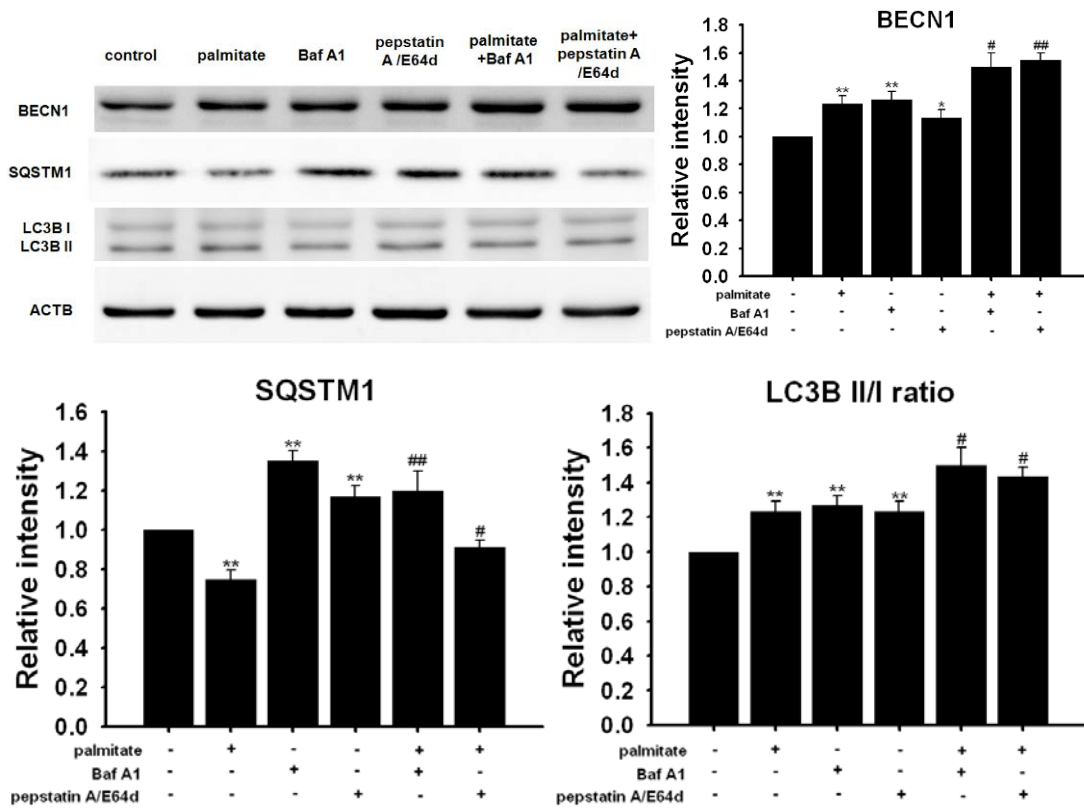

**Supplemental Figure 2. High FFA concentrations enhance autophagy in cultured H9c2 cardiac cells.** H9c2 cells were analyzed after treatment with palmitate (1 mM) for 48 h. A, Bafilomycin A1 (Baf A1, 10 nM), or pepstatin A (10 µg/mL) and E64d (10 µg/mL) were added 4 h before harvesting. B, Bafilomycin A1 (Baf A1, 10 nM), or pepstatin A (10 µg/mL) and E64d (10 µg/mL) were added 12 h before harvesting. Data are expressed as mean±SEM. \*p<0.05 vs. control, \*\*p<0.01 vs. control, #p<0.05 vs. palmitate, ##p<0.01 vs. palmitate. Data are representative of three independent experiments.

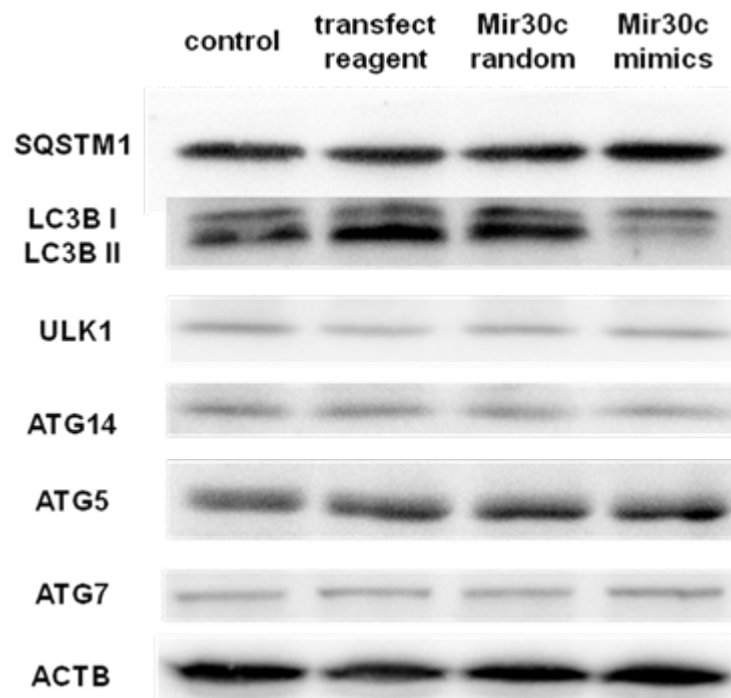

**Supplemental Figure 3. The effect of Mir30c on the abundance of autophagy-associated proteins.** Levels of autophagy-associated proteins were detected in H9c2 cells by western blotting. ACTB was used as an internal control. Experimental details can be found in Materials and Methods.

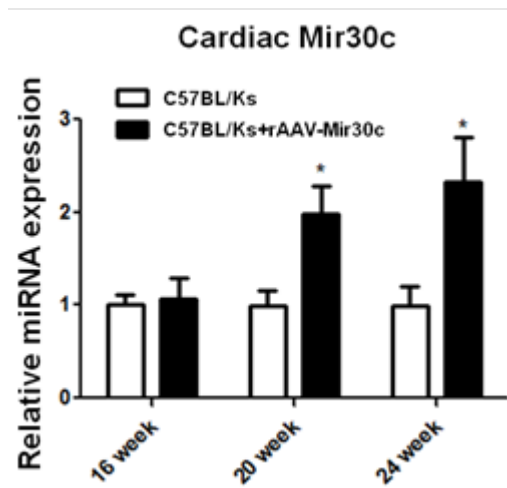

**Supplemental Figure 4. The expression of *Mir30c* in C57BL/Ks control mice of different ages.** The rAAVs were injected via the tail vein of 16-week-old animals, and cardiac *Mir30c* expression was determined every 4 weeks by qRT-PCR. U6 was used as an internal control. \* $p < 0.05$  vs. untreated control at the same time point. Data are expressed as means $\pm$ SEM (n=8). They are representative of three independent experiments.

**A**

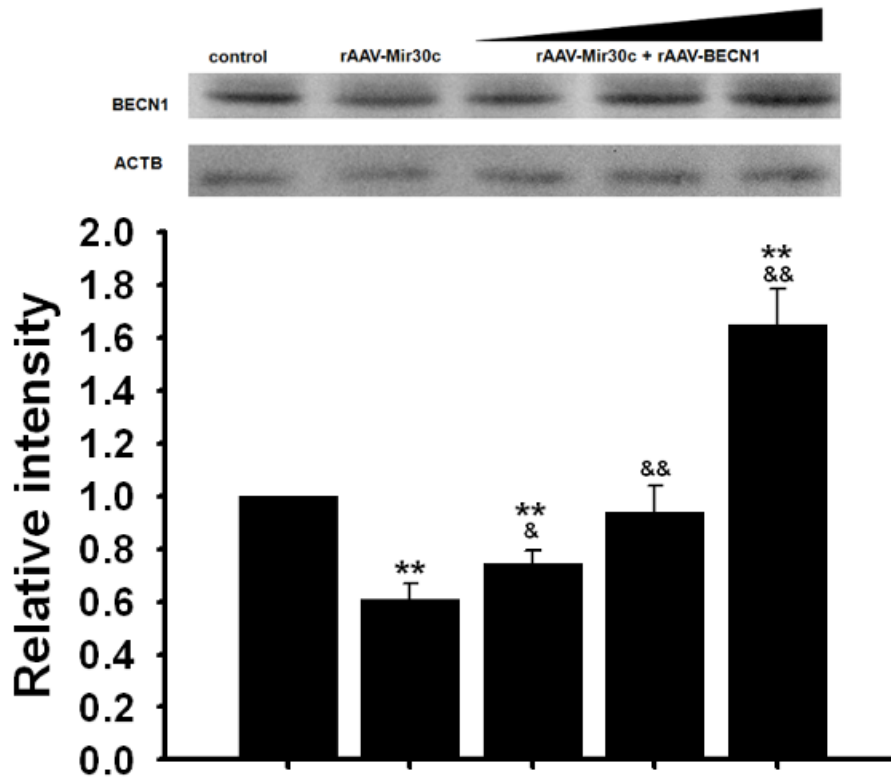

**B**

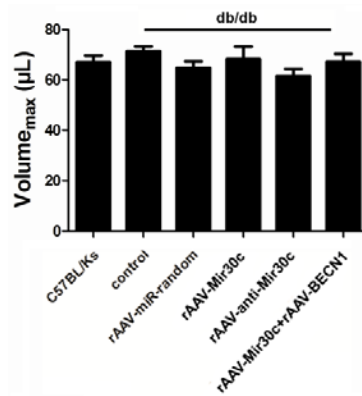

**C**

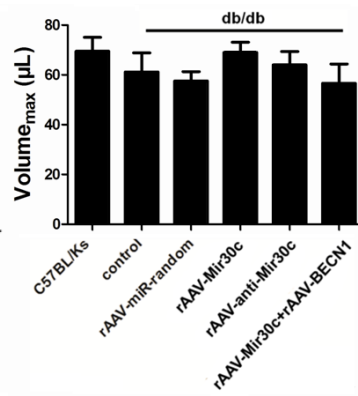

**D**

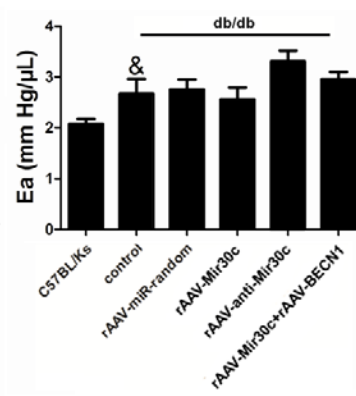

**Supplemental Figure 5. BECN1 rescues cardiac function in db/db mice.** A, Three different doses of BECN1 ( $0.5 \times 10^{11}$  virion particles,  $1 \times 10^{11}$  virion particles, or  $2 \times 10^{11}$  virion particles) rescued cardiac BECN1 expression in db/db mice, as determined by western blotting. \*\* $p < 0.01$  vs. control, # $p < 0.05$  vs. rAAV-Mir30c, ## $p < 0.01$  versus rAAV-Mir30c. B, Volume<sub>max</sub>, determined by hemodynamic analyses. C, Volume<sub>max</sub>, assessed by echocardiography. D, Ea,



determined by hemodynamic analyses. <sup>&</sup>p<0.05 vs. C57BL/Ks. Data are expressed as mean±SEM (n=8). They are representative of three independent experiments.

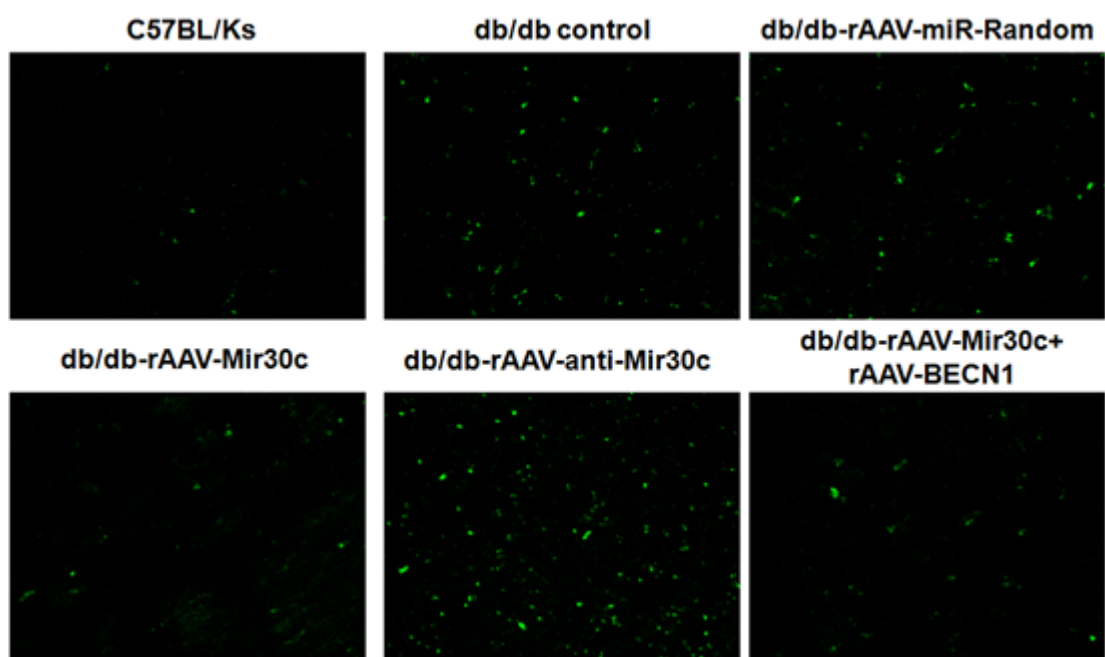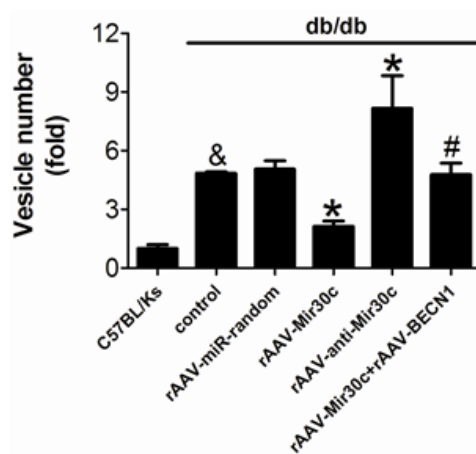

**Supplemental Figure 6. Autophagosome formation in db/db mice.** db/db mice were treated with different rAAVs for 4 weeks and injected with pCMV-LC3-GFP via their tail vein 1 week before sacrifice subsequently. GFP-LC3 expression in the heart was analyzed by confocal microscopy (upper panels; 600× magnification). Autophagosomes were quantified by counting GFP-LC3–positive dots and normalizing for cross-sectional area (lower panel). Data are expressed as mean±SEM (n=5). &p<0.05 vs. C57BL/Ks, \*p<0.05 vs. db/db control, #p<0.05 vs. db/db rAAV-Mir30c. Data are representative of three independent experiments.

Supplemental Table 1. Baseline clinical characteristics of controls and patients

| Characteristic <sup>a</sup> | Control (n=28) | Diabetes (n=26) | Chronic heart failure (n=22) | Diabetes combined with chronic heart failure (n=15) |
|-----------------------------|----------------|-----------------|------------------------------|-----------------------------------------------------|
| Male/female (n/n)           | 14/14          | 9/17            | 14/8                         | 10/5                                                |
| Age (years)                 | 56.6±1.46      | 61.6±1.85       | 58.0±3.44                    | 60.0±3.03                                           |
| SBP (mmHg)                  | 125±3          | 147±5*          | 123±5                        | 138±6 <sup>#</sup>                                  |
| DBP (mmHg)                  | 77±2           | 84±4            | 77±3                         | 82±6                                                |
| Cr (mmol/L)                 | 69.9±2.3       | 64.1±4.6        | 95.1±6.1*                    | 86.1±6.8*                                           |
| BUN (mmol/L)                | 5.00±0.25      | 6.46±0.45*      | 8.25±0.75*                   | 8.90±1.10*                                          |
| Fasting glucose (mmol/L)    | 5.18±0.10      | 14.2±1.31*      | 6.17±0.25*                   | 10.0±0.33 <sup>#</sup>                              |
| TG (mmol/L)                 | 1.35±0.17      | 1.72±0.19       | 1.19±0.11                    | 1.32±0.17                                           |
| TC (mmol/L)                 | 4.02±0.13      | 3.86±0.14       | 3.86±0.18                    | 4.01±0.33                                           |
| HDL (mmol/L)                | 1.10±0.06      | 0.93±0.05       | 0.95±0.06                    | 0.80±0.10*                                          |
| LDL (mmol/L)                | 2.44±0.12      | 2.21±0.12       | 2.49±0.16                    | 2.64±0.31                                           |
| NT-proBNP (ng/L)            | 66±10          | 621±202*        | 4715±915*                    | 5574±1647*                                          |
| EF (%)                      | 65.1±1.6       | 65.6±1.0        | 36.5±2.6*                    | 35.2±2.6*                                           |

<sup>a</sup> BMI, Body mass index; SBP, systolic blood pressure; DBP, diastolic blood pressure; Cr, creatinine; BUN, blood urea nitrogen; TG, Triglyceride; TC, total cholesterol; HDL, high-density lipoprotein; LDL, low-density lipoprotein; NT-proBNP, amino-terminal pro-brain natriuretic peptide; EF, ejection fraction. Data are presented as mean±SEM. \*p<0.05 vs. control; <sup>#</sup>p<0.05 vs. chronic heart failure.

Supplemental Table 2. Hemodynamic variables of C57BL/Ks mice receiving different treatments<sup>a</sup>

| <b>Variable<sup>b</sup></b>         | <b>Control (8)</b> | <b>rAAV-miR-Random (8)</b> | <b>rAAV-<i>Mir30c</i> (8)</b> | <b>rAAV-anti-<i>Mir30c</i> (8)</b> |
|-------------------------------------|--------------------|----------------------------|-------------------------------|------------------------------------|
| <b>HR (b.p.m.)</b>                  | 528±54             | 493±40                     | 505±50                        | 507±39                             |
| <b>dP/dt<sub>max</sub> (mmHg/s)</b> | 11,630±542         | 11,480±633                 | 11,918±385                    | 12,248±703                         |
| <b>dP/dt<sub>min</sub> (mmHg/s)</b> | -10,833±1053       | -11,204±726                | -11,423±972                   | -11,504±355                        |
| <b>P<sub>max</sub> (mmHg)</b>       | 107.8±4.8          | 107.6±3.4                  | 104.6±3.7                     | 108.4±3.6                          |
| <b>P<sub>es</sub> (mmHg)</b>        | 94.3±5.6           | 92.2±1.9                   | 94.8±4.6                      | 94.3±4.6                           |

<sup>a</sup> Data are expressed as mean±SD; numbers in parentheses represent numbers of mice/group; ANOVA test was performed, and p<0.05 was considered statistically significant. No significant differences were detected among the groups.

<sup>b</sup> HR, heart rate; P<sub>max</sub>, maximum pressure; P<sub>es</sub>, end-systolic pressure.

Supplemental Table 3. Echocardiographic characteristics of LV parameters in C57BL/Ks and db/db mice that received different treatments<sup>a</sup>

| Characteristic <sup>b</sup> | C57BL/Ks (8) <sup>c</sup> | db/db                       |                     |                         |                              |                                     |
|-----------------------------|---------------------------|-----------------------------|---------------------|-------------------------|------------------------------|-------------------------------------|
|                             |                           | control (8)                 | rAAV-miR-Random (8) | rAAV- <i>Mir30c</i> (8) | rAAV-anti- <i>Mir30c</i> (8) | rAAV- <i>Mir30c</i> +rAAV-BECN1 (8) |
| HR (b.p.m.)                 | 502±5                     | 450±13 <sup>&amp;</sup>     | 469±14              | 461±16                  | 462±18                       | 455±15                              |
| LVPWd (mm)                  | 0.79±0.04                 | 0.82±0.05                   | 0.82±0.13           | 0.84±0.07               | 1.00±0.06                    | 0.91±0.07                           |
| LVPWs (mm)                  | 1.12±0.13                 | 1.13±0.08                   | 1.13±0.10           | 1.16±0.09               | 1.19±0.07                    | 1.19±0.14                           |
| LVAWd (mm)                  | 0.83±0.03                 | 0.88±0.06                   | 0.89±0.07           | 0.85±0.07               | 0.92±0.06                    | 0.90±0.09                           |
| LVAWs (mm)                  | 1.18±0.08                 | 1.22±0.08                   | 1.28±0.03           | 1.26±0.13               | 1.39±0.16                    | 1.27±0.13                           |
| LVIDd (mm)                  | 3.66±0.11                 | 3.77±0.35                   | 3.68±0.20           | 3.97±0.22               | 3.84±0.26                    | 3.64±0.42                           |
| LVIDs (mm)                  | 2.23±0.07                 | 2.56±0.25 <sup>&amp;</sup>  | 2.49±0.18           | 2.45±0.12               | 2.85±0.25                    | 2.48±0.35                           |
| LV Vold (μL)                | 56.72±3.84                | 61.14±13.29                 | 57.56±7.45          | 69.04±9.09              | 64.02±10.74                  | 56.63±15.50                         |
| LV Vols (μL)                | 16.80±1.41                | 23.88±5.63 <sup>&amp;</sup> | 22.18±4.03          | 21.26±2.56              | 31.15±6.74                   | 22.52±7.74                          |

<sup>a</sup> Data are expressed as mean±SD; numbers in parentheses represent numbers of mice/group; Student's *t* test was performed and  $p < 0.05$  was considered statistically significant.

<sup>b</sup> HR, heart rate; LVPW, left ventricular posterior wall thickness; LVAW, Left ventricular anterior wall thickness; LVID, left ventricular internal dimension; LV Vol, left ventricular volume; s, end-systole; d, end-diastole.

<sup>c</sup> <sup>&</sup> $p < 0.05$  vs. C57BL/Ks.

Supplemental Table 4. Hemodynamic variables of db/db mice receiving different treatments<sup>a</sup>

| Variable <sup>b</sup>         | Control (8) <sup>c</sup> | rAAV-miR-Random (8) | rAAV- <i>Mir30c</i> (8) | rAAV- <i>Mir30c</i> +<br>rAAV-BECN1<br>3'-UTR WT (8) | rAAV- <i>Mir30c</i> +<br>rAAV-BECN1<br>3'-UTR mut (8) | rAAV-miR-Random<br>+rAAV-BECN1<br>3'-UTR WT (8) |
|-------------------------------|--------------------------|---------------------|-------------------------|------------------------------------------------------|-------------------------------------------------------|-------------------------------------------------|
| HR (b.p.m.)                   | 428±37                   | 415±31              | 398±44                  | 432±35                                               | 397±39                                                | 398±25                                          |
| dP/dt <sub>max</sub> (mmHg/s) | 8302±418                 | 8450±681            | 9581±696*               | 9121±326*                                            | 7856±546 <sup>&amp;</sup>                             | 6269±422 <sup>#</sup>                           |
| dP/dt <sub>min</sub> (mmHg/s) | -6165±778                | -6242±607           | -7245±880*              | -5922±968                                            | -5195±392 <sup>&amp;</sup>                            | -5075±380                                       |
| P <sub>max</sub> (mmHg)       | 98.2±5.7                 | 99.9±9.3            | 99.3±4.2                | 108.4±3.6 <sup>&amp;</sup>                           | 103.4±5.2                                             | 96.8±4.2                                        |
| P <sub>es</sub> (mmHg)        | 85.3±8.7                 | 91.2±9.0            | 93.9±6.9                | 88.5±1.8                                             | 96.3±9.5                                              | 92.4±8.9                                        |

<sup>a</sup> Data are expressed as mean±SD; numbers in parentheses represent numbers of mice/group. Student's *t* test was performed.

<sup>b</sup> HR, heart rate; P<sub>max</sub>, maximum pressure; P<sub>es</sub>, end-systolic pressure.

<sup>c</sup> \*p<0.05 vs. control; <sup>&</sup>p<0.05 vs. rAAV-*Mir30c*; <sup>#</sup>p<0.05 vs. rAAV-miR-Random.

Supplemental Table 5. Real-time PCR primers

| <b>Gene</b>         | <b>Forward</b>               | <b>Reverse</b>               |
|---------------------|------------------------------|------------------------------|
| <b>Mouse Tnnt1</b>  | 5' TCGACCACCTGAATGAAGACC 3'  | 5' TTCCTGCAGGTCGAACTTCTC 3'  |
| <b>Mouse Tnni3</b>  | 5' TCTATGACCTCCGTGGCAAGT 3'  | 5' TCCTCCTTCTTCACCTGCTTG 3'  |
| <b>Mouse Col1a1</b> | 5' CCGAGGTATGCTTGATCT 3'     | 5' GACAGTCCAGTTCTTCATTG 3'   |
| <b>Mouse Fn1</b>    | 5' GTGTCTATGCTCTCAAGGA 3'    | 5' CTAATAGTGATGGTGGTCTCT 3'  |
| <b>Mouse Sp1</b>    | 5' AACCTTCCTTGTCTTGGCTGAG 3' | 5' TCAGTTCCTGGTAGAGAAGGC 3'  |
| <b>Mouse Gapdh</b>  | 5' GGTGAAGGTCGGTGTGAACG 3'   | 5' CTCGCTCCTGGAAGATGGTG 3'   |
| <b>Rat Becn1</b>    | 5' GCCACAAGCATCTCATCTCAA 3'  | 5' AGCACGCCATGTATAGCAAAGA 3' |
| <b>Rat Gapdh</b>    | 5' ACAGCAACAGGGTGGTGGAC 3'   | 5' TTTGAGGGTGCAGCGAACTT 3'   |
